# Supplementary material for: Enhancing Therapeutic Communication Among Nursing Students: A Simulation-Based Approach
Source: Research Square preprint supplement (doi:10.21203/rs.3.rs-6553723/v1), 2025-06-02
Supplement: Supplementary file 1 [file 7432731cb2891ff14f66eee1.docx]

# Supplementary File 1: Structured Knowledge Questionnaire and Observational Checklist

Study Title: Enhancing Therapeutic Communication Among Nursing Students: A Simulation-Based Approach

## Part A: Socio-Demographic Questionnaire

Instructions: Please tick (✓) the most appropriate response for each item.

1. Age (in completed years):
 ☐ 18–20 years
 ☐ 21–23 years
 ☐ Above 23 years

2. Gender:
 ☐ Male
 ☐ Female
 ☐ Prefer not to say

3. Current Year of Study in Nursing Program:
 ☐ 1st Year
 ☐ 2nd Year
 ☐ 3rd Year
 ☐ Final Year

4. Are you comfortable studying in a group setting?
 ☐ Yes
 ☐ No
 ☐ Sometimes

5. Have you ever attended a simulation workshop or conference related to communication skills?
 ☐ Yes
 ☐ No

6. How many hours do you usually spend in self-study per day (excluding class hours)?
 ☐ Less than 1 hour
 ☐ 1–2 hours
 ☐ 2–4 hours
 ☐ More than 4 hours

## Part B: Structured Knowledge Questionnaire

Instructions: Please read the following questions carefully and choose the most appropriate option. Each correct answer carries 1 mark. Total Score: 20

Domains:
- Active Listening (Q1–Q5)
- Empathy (Q6–Q10)
- Open-ended Questioning (Q11–Q15)
- Nonverbal Communication (Q16–Q20)

1. **Therapeutic communication is the….**
2. Process of transferring information from one person to another person.
3. Process, It makes a patient feel uncomfortable and increases their stress.
4. Process, in which a nurse communicates with the patient by using her professional skills.
5. Process, It includes expressions and activities that make a patient feel mentally deteriorated and even physical well-being.
6. **The phases of therapeutic communication in order…**
7. Termination, Introductory, working, Pre-interaction phase.
8. Working, pre-interaction, termination. Introductory.
9. Pre-interaction, Introductory, Working, Termination.
10. Orientation. working, pre-interaction. Termination.
11. **The factors of therapeutic communication** **are...**
12. Challenging, probing, defensiveness.
13. Rejection, disagreement, and judgments.
14. Spiritual elements, Financial state, mental state.
15. Values culture, race preconceived ideas & patient’s beliefs past experiences expectations.
16. **The goal of therapeutic communication is….**
17. Helping the client solve problems & with daily activities.
18. To facilitate communication of distressing thoughts & feelings
19. To promote self-care & independence & help the client with problem-solving.
20. Help the client not to examine self-defeating behaviors and test alternatives.
21. **The purpose of therapeutic communication is..**
22. Encourage discussion of upsetting ideas and emotions.
23. Give each patient the knowledge and emotional support required to attain their health and well-being.
24. Encourage self-reliance and individuality.
25. To compile data about the patient's family history.
26. **Role & responsibility of therapeutic communication is..**
27. Not to help the client to cope-up with strategies dealing with the specific situation.
28. Encourage to discuss the changes needed to make in the client.
29. Discuss alternative strategies for creating changes the client desire to make.
30. B & C both
31. **Mr. Abhinav, Nurse establishes trust with the patient by…**
32. He provides the blanket to the patient.
33. He discusses mistrust openly in front of the patient.
34. He shows disrespect towards the patient.
35. He avoids communicating with the patient.
36. **Mrs. Savita Behera, Nurse establishes the rapport with her assigned patient by...**
37. She keeps all promises given to the patient.
38. She calls the names of patients rather than the bed number.
39. She listens to the patient carefully.
40. She provides food when the patient feels hungry.
41. **Ms. Riya, the Nurse shows respect towards the patient by…**
42. She calls the names of patients & spends time with them.
43. She is being honest & keeping promises.
44. She is interested in talking with the patient.
45. She is keeping promises & spending time with them.
46. **Mr. Rajiv, Nurse maintains empathy with the patient by…**
47. He interacted with the patient openly and realistically.
48. He performs activities for the patient.
49. He accurately perceives & understands the meaning of the patient’s thoughts & feelings.
50. He maintains their documents confidential.
51. **The patient said “My father shouted at me repeatedly”, The Nurse replied to the patient “Your father was a strict disciplinarian”. In this conversation****, the therapeutic communication technique used by the nurse is…**
52. Restatement
53. Offering general leads
54. Focusing
55. Accepting
56. **The nurse maintains eye contact & friendly nonverbal communication with the patient,” In this conversation, the therapeutic communication technique used by the nurse is…**
57. Humor
58. Reflection
59. Clarification
60. Listening
61. **Therapeutic communication technique helps the nurse to perceive the patient’s facial expression by….**
62. Focusing
63. Observation
64. Personal space
65. Accepting
66. **The nurse introduces herself at the start of the duty to the 24-year-old female patient, the nurse’s response is….**
67. Follow the patient & tell her that you need to ask her some questions.
68. Report her behavior to the doctor.
69. Give the patient some time and check back with her in a few minutes.
70. Tell the patient that you need to talk with her about her problem.
71. **Nurse interacts with newly admitted patients in the ward-“ Hello miss Riya, I would like to sit with you for some time to help you get comfortable talking to me.” In this conversation, the therapeutic communication technique used by the nurse is…**
72. Offering self
73. Accepting
74. Active listening
75. Broad opening
76. **The nurse asked the patient “What happened to you & Why were you admitted to the hospital?” The patient replied, “He had taken excessive alcohol for 4-5 years, so after that, he had some problems like, he didn’t concentrate on his studies & also have the problem of the mind related problems”. In this conversation, the therapeutic communication technique used by the nurse is…**
77. Broad opening
78. Restating
79. Observation
80. Giving recognition
81. **Nurse asked the patient “Do you know why are you admitted to the hospital?” Then the patient replied, "I tried to kill myself by taking sleeping pills”. In this conversation, the therapeutic communication technique used by the nurse is…**
82. Observation
83. Placing the event in time or sequence
84. Restating
85. Exploring
86. **Nurses ask the patient “Why are you not taking food?” Then the patient replied, “I don’t like the food & I want to go home”. In this conversation, the therapeutic communication technique used by the nurse is…**
87. Suggesting
88. Encouraging the description of perception
89. Restatement
90. Pinpointing
91. **The nurse asks the patient “What are you taking for breakfast?” and the patient replies, “I ate idly & gun “. In this conversation, the therapeutic communication technique used by the nurse is…**
92. Silence
93. Encouraging comparison
94. Reflecting
95. Seeking clarification
96. **Nurse asks the patient “What’s on your mind today?”, then the patient replied that “I want to be discharged today, after that, I spend my all time with my daughter & my family member”. In this conversation, the therapeutic communication technique used by the nurse is….**
97. Silence
98. Focusing
99. Broad opening
100. Recognition

Scoring:
0–7 = Poor Knowledge
8–20 = Good Knowledge

## Part C: Structured Observational Checklist

Instructions: Mark observed behaviors using the following scale:
1 = Not Demonstrated
2 = Partially Demonstrated
3 = Fully Demonstrated

Domains:
- Preparatory Behaviors
- Interactional Response Techniques
- Closing Skills

| S.N | Observed Behavior | Rating (1–3) | Remarks |
| --- | --- | --- | --- |
| 1 | Introduces self to the patient. | ☐ |  |
| 2 | Maintains professional appearance and posture. | ☐ |  |
| 3 | Ensures privacy and a quiet environment. | ☐ |  |
| 4 | Maintains appropriate eye contact. | ☐ |  |
| 5 | Begins with appropriate greeting and name use. | ☐ |  |
| 6 | Uses active listening skills (e.g., nodding, verbal cues). | ☐ |  |
| 7 | Paraphrases or restates patient concerns. | ☐ |  |
| 8 | Uses appropriate therapeutic silence. | ☐ |  |
| 9 | Shows empathy through verbal and non-verbal communication. | ☐ |  |
| 10 | Encourages patient to express feelings openly. | ☐ |  |
| 11 | Asks open-ended questions. | ☐ |  |
| 12 | Avoids interrupting the patient. | ☐ |  |
| 13 | Maintains nonjudgmental tone. | ☐ |  |
| 14 | Clarifies patient statements when needed. | ☐ |  |
| 15 | Validates patient’s emotions appropriately. | ☐ |  |
| 16 | Summarizes key points from the interaction. | ☐ |  |
| 17 | Provides emotional reassurance to the patient. | ☐ |  |
| 18 | Checks for patient understanding. | ☐ |  |
| 19 | Offers follow-up or next steps. | ☐ |  |
| 20 | Ends interaction with polite closure. | ☐ |  |

Scoring:
1–27 = Poor Practice
28–72 = Good Practice
